# Supplementary material for: Single molecule localization microscopy coupled with touch preparation for the quantification of trastuzumab-bound HER2
Source: PubMed Central journal article supplement (PMC6181918; doi:10.1038/s41598-018-33225-0), 2018-10-11
Supplement: 41598_2018_33225_MOESM1_ESM.pdf [file 41598_2018_33225_MOESM1_ESM.pdf]

## Supplementary Information

### Single molecule localization microscopy coupled with touch preparation for the quantification of trastuzumab-bound HER2

Steven J. Tobin, Devin L. Wakefield, Veronica Jones, Xueli Liu, Daniel Schmolze, Tijana Jovanović-Talisman

#### Supplementary Figure 1

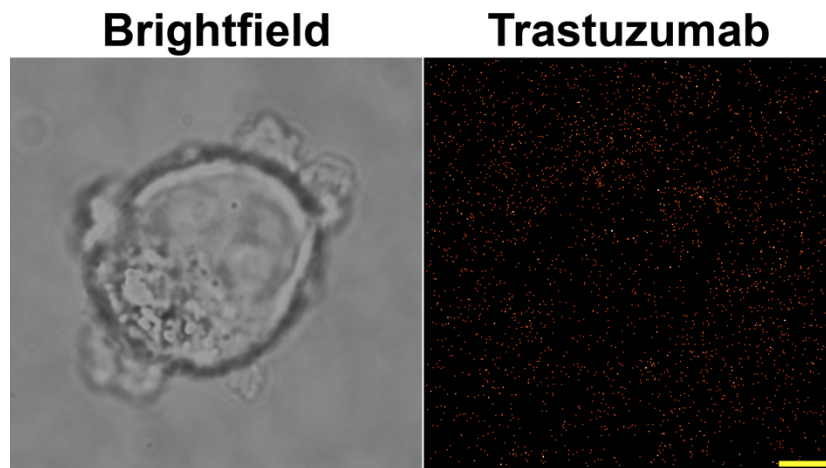

**Supp. Fig. 1. Trastuzumab-AF647 is specific for HER2 in breast cancer cell lines.** HER2 protein was preincubated with 50 nM trastuzumab-AF647 and applied to cells. Negligible SMLM signal was observed on all coverslips. A representative image of a BT-474 cell incubated with HER2 and trastuzumab-AF647 complex is shown; brightfield image (left) and direct stochastic optical reconstruction microscopy (dSTORM) image (right).

## Supplementary Figure 2

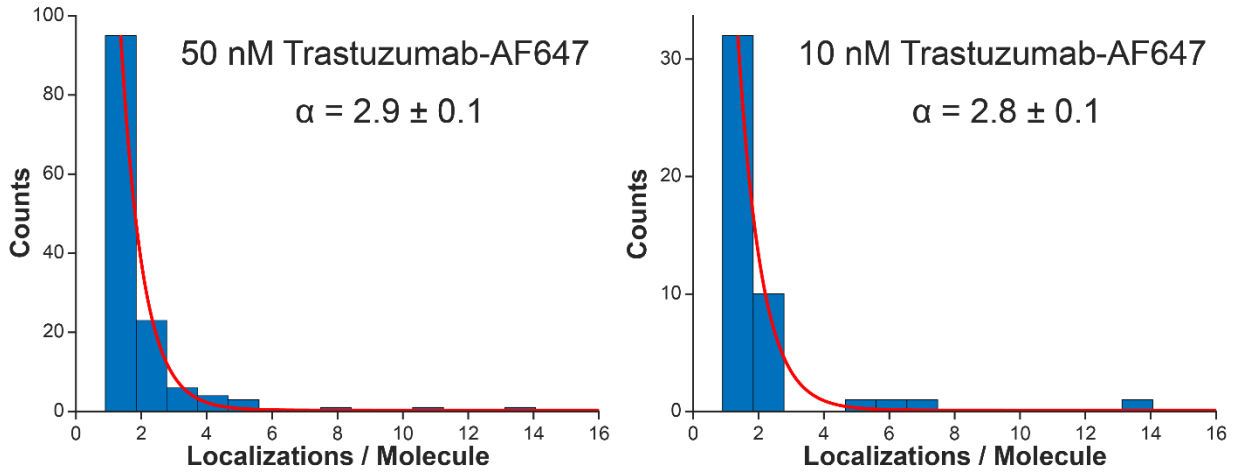

**Supp. Fig. 2. Average number of localizations per molecule for trastuzumab-AF647.** Sparse trastuzumab-AF647 staining in MDA-MB-468 cells was used to obtain the average number of appearances ( $\alpha$ ). Detected localizations within a region of interest ( $64 \mu\text{m}^2$ ) were first grouped (assigned to a single molecule) using spatial and temporal thresholds: a resolution-limited distance and a temporal window equal to the maximum fluorophore dark time<sup>1</sup>. Localizations were assigned to a new molecule if both criteria were not met. Histograms for the distribution of these grouped localizations is provided here for trastuzumab-AF647 staining at 50 nM (21 cells) and 10 nM (9 cells). A single exponential fit (red line) is applied to extract the value for the average number of localizations (appearances) for a single trastuzumab-AF647 Ab.

Supplementary Figure 3

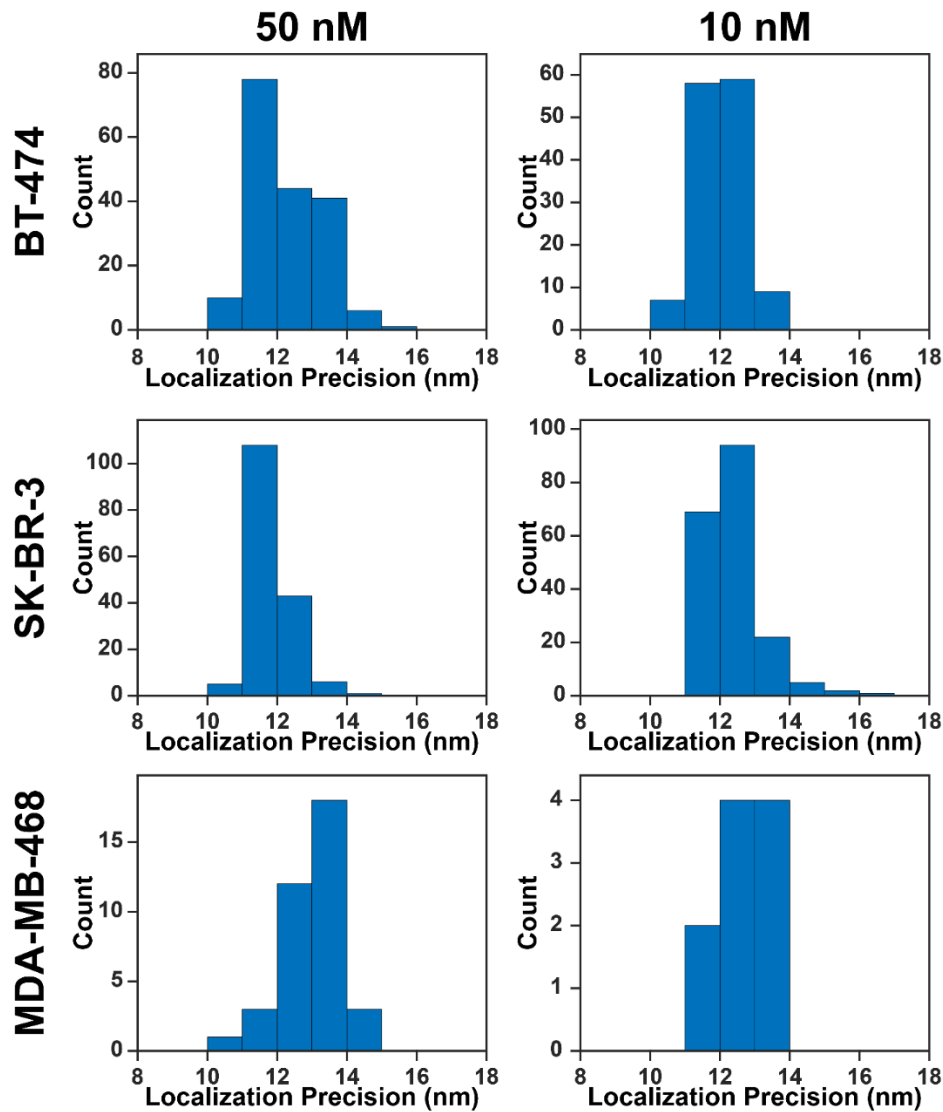

Supp. Fig. 3. Localization precision ( $\sigma$ ) distributions from breast cancer cell lines. Cells were stained with either 50 or 10 nM trastuzumab-AF647.  $\sigma$  is provided for all ROIs used for data analysis.

Supplementary Figure 4

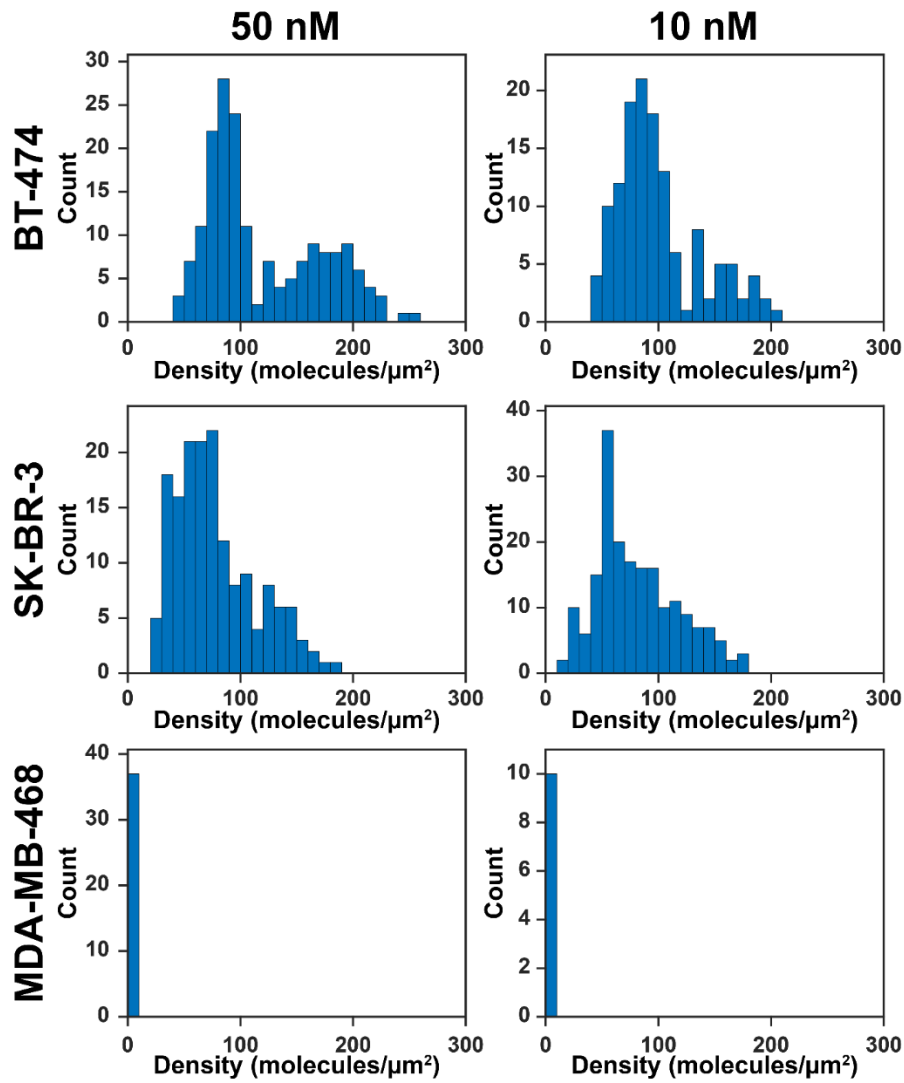

Supp. Fig. 4. Density distributions from breast cancer cell lines. Cells were stained with either 50 or 10 nM trastuzumab-AF647. Density is provided for all reported ROIs.

Supplementary Figure 5

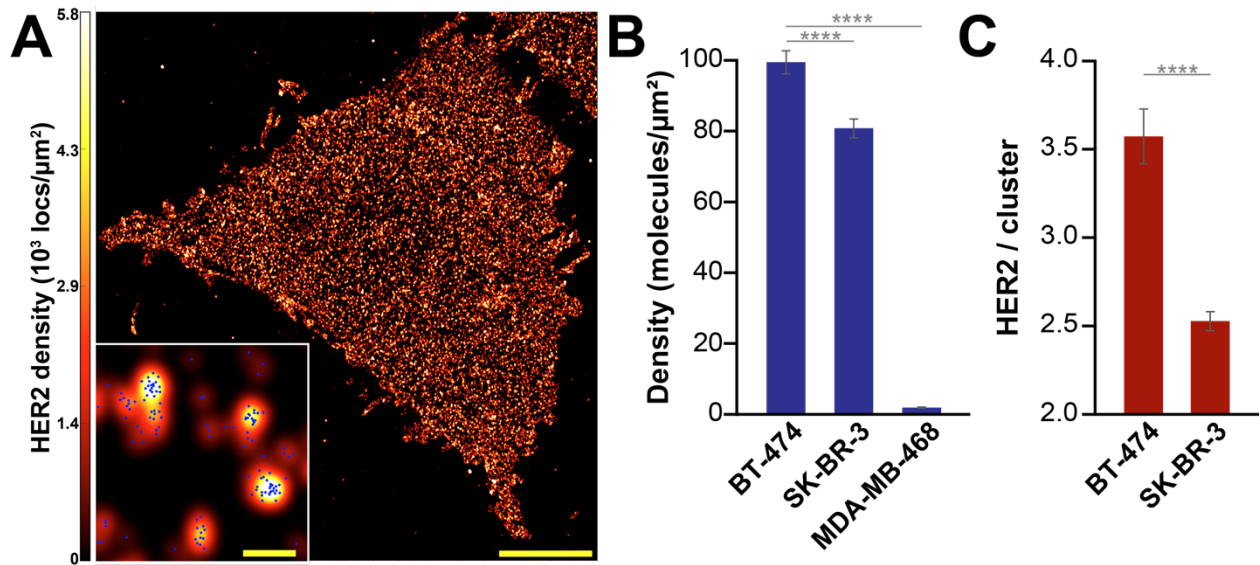

**Supp. Fig. 5. HER2 molecular features in breast cancer cell lines stained with 10 nM trastuzumab-AF647.** BT-474, SK-BR-3, and MDA-MB-468 cells were fixed, stained with 10 nM trastuzumab-AF647, and imaged with dSTORM. **A.** A BT-474 cell with individual localizations processed from NIS-Elements (blue dots) and rendered by a Gaussian blur. The intensity of the Gaussian blur is proportional to the localization density. Scale bar: 5  $\mu\text{m}$ . A zoomed-in region is provided as an inset (scale bar: 100 nm). **B.** Average detected HER2 density for BT-474 cells (18 cells, 133 ROIs), SK-BR-3 cells (20 cells, 193 ROIs), and MDA-MB-468 cells (5 cells, 10 ROIs); \*\*\*\* $p < 0.0001$ . **C.** Average number of HER2 receptors per cluster for BT-474 and SK-BR-3 cells calculated using pair-correlation (PC) analysis. Clustered regions were used for analysis (57 ROI for BT-474 and 114 ROI for SK-BR-3); \*\*\*\* $p < 0.0001$ . All error bars represent SEM.

Supplementary Figure 6

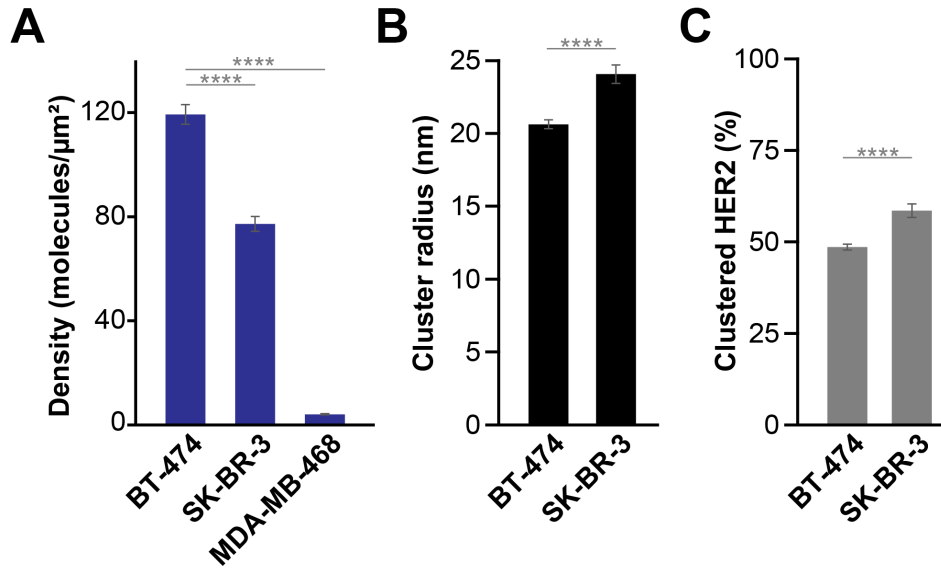

Supp. Fig 6. Additional HER2 molecular features in breast cancer cell lines stained with 50 nM trastuzumab-AF647. **A.** Average detected HER2 density (as presented in Fig. 1C).  $p$ -value<sub>split</sub> values: 0.5 for BT-474 cells, 0.3 for SK-BR-3 cells, 0.2 for MDA-MB-468 cells. **B.** Average HER2 cluster radius. **C.** The average fraction of HER2 molecules residing in clusters with more than two receptors. For **B** and **C**, clustered regions were used for analysis (53 ROI for BT-474 and 31 ROI for SK-BR-3); \*\*\*\* $p < 0.0001$ . All error bars represent SEM.

Supplementary Figure 7

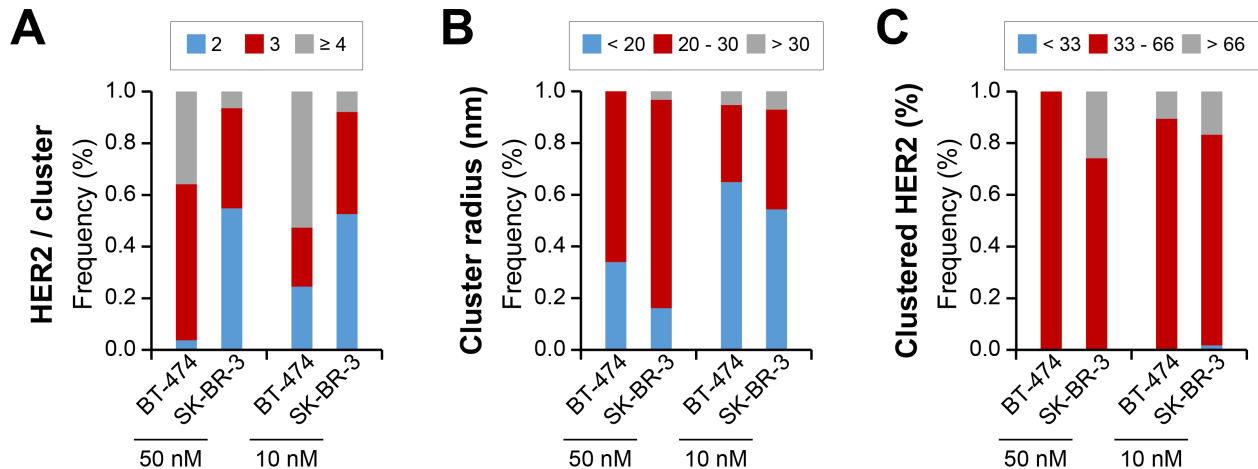

Supp. Fig 7. Distribution of clustering parameters from breast cancer cell lines stained with either 50 nM or 10 nM trastuzumab-AF647. **A.** Number of HER2 receptors per cluster. **B.** Cluster radius. **C.** Fraction of HER2 molecules residing in clusters with more than two receptors.

Supplementary Figure 8

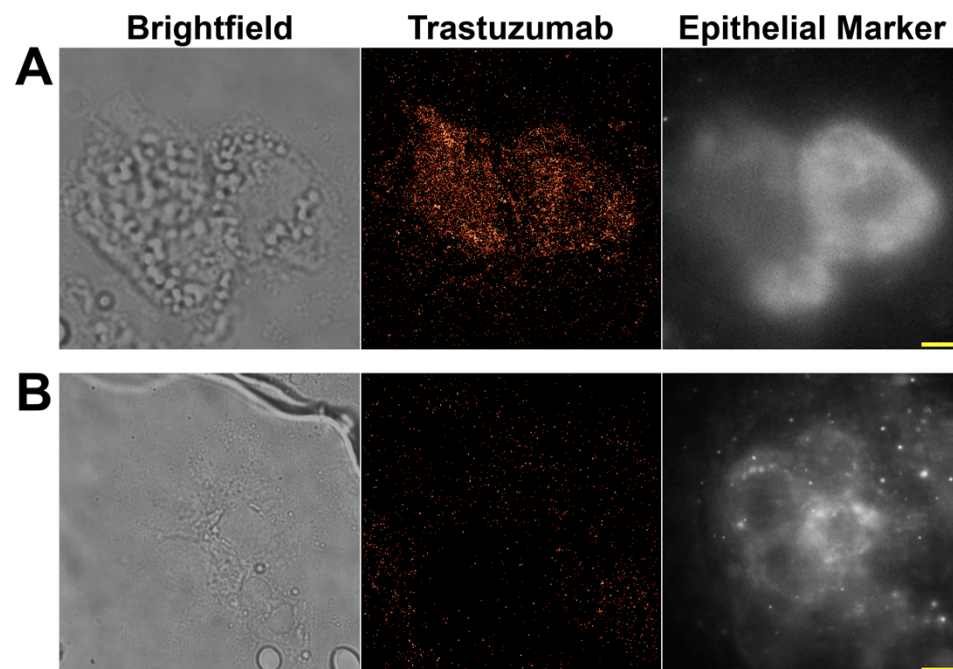

**Supp. Fig. 8. Trastuzumab-AF647 is specific for HER2 in breast cancer tissues. A.** Brightfield, dSTORM (detecting trastuzumab-AF647), and TIRF (detecting AF405 labeled epithelial marker) image of a tissue sample region from P3. **B.** Coverslip with tissue sample from P5 was incubated with HER2 and trastuzumab-AF647 complex; brightfield image (left), dSTORM image (middle), and TIRF image (right). Negligible SMLM signal was observed on all investigated coverslips. Scale bars: 5  $\mu$ m.

### Supplementary Figure 9

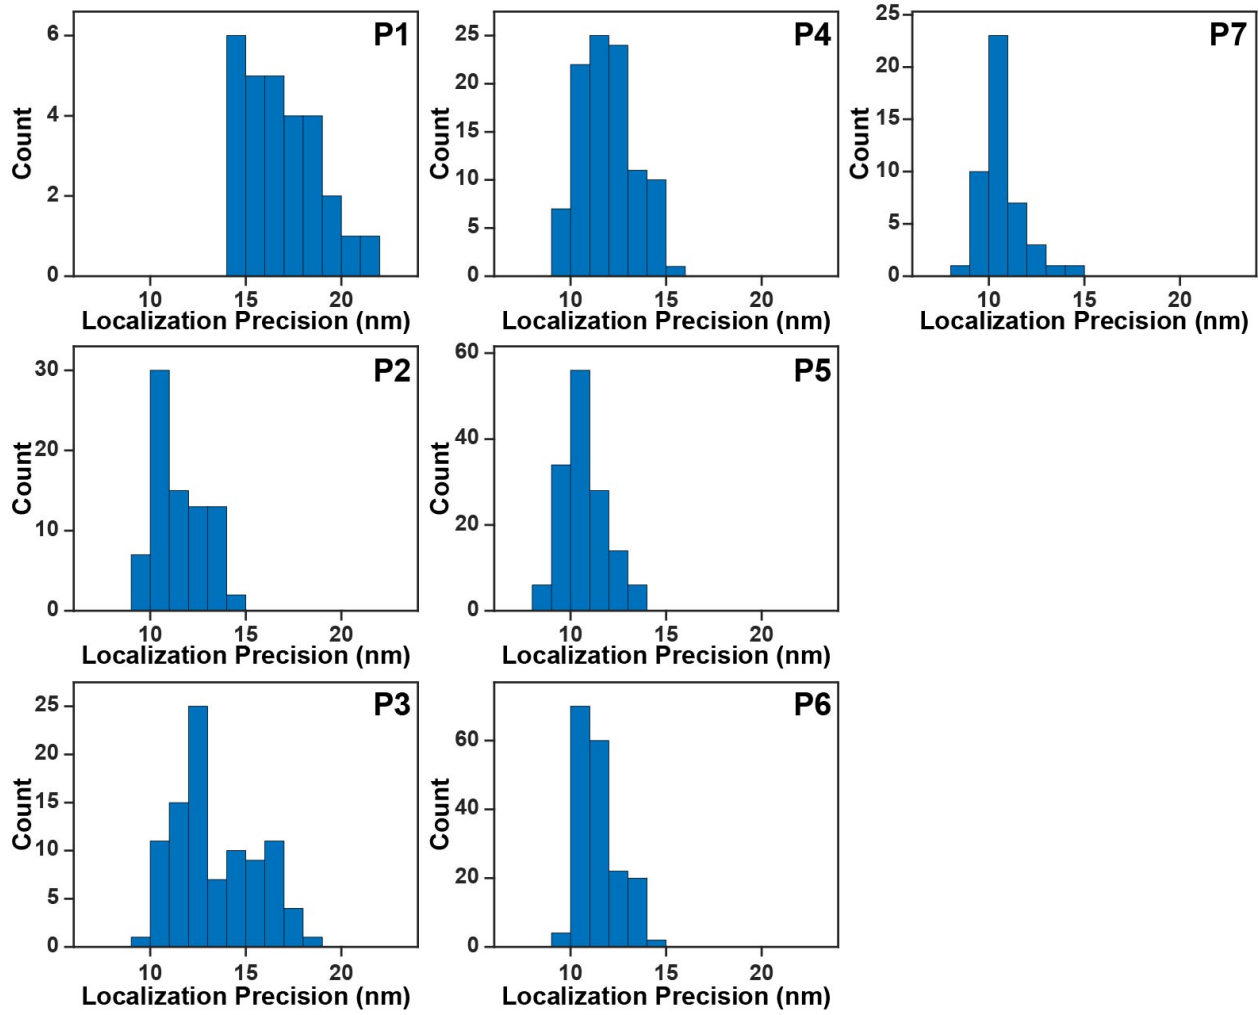

**Supp. Fig. 9. Localization precision ( $\sigma$ ) distributions from breast cancer tissues.**  $\sigma$  is provided for all ROIs used for data analysis.



Supplementary Figure 10

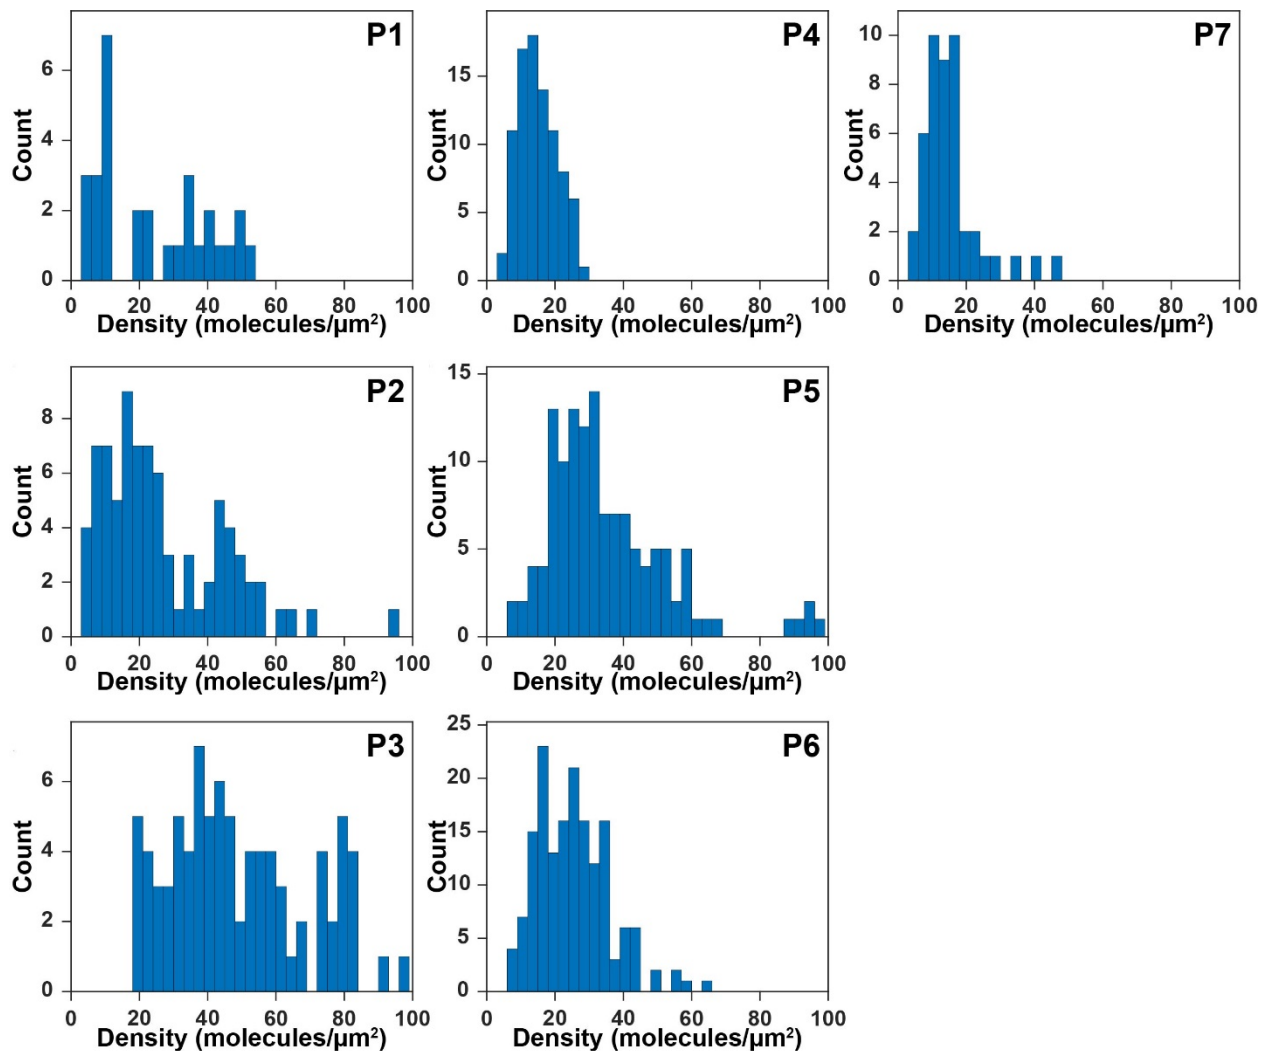

Supp. Fig. 10. Density distributions from breast cancer tissues. Density is provided for all reported ROIs.

## Supplementary Figure 11

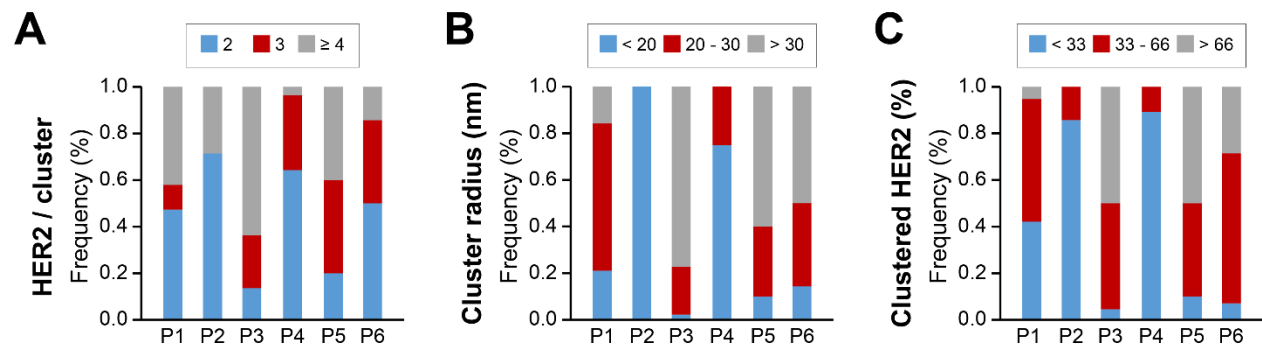

**Supp. Fig 11. Distribution of clustering parameters from breast cancer tissues. A.** Number of HER2 receptors per cluster. **B.** Cluster radius. **C.** Fraction of HER2 molecules residing in clusters with more than two receptors.

## Supplementary Figure 12

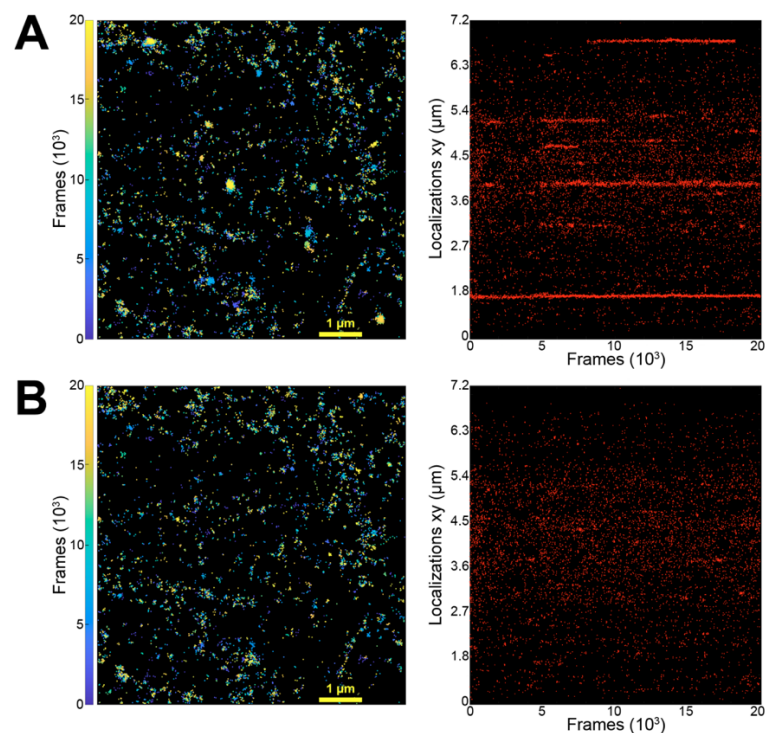

**Supp. Fig. 12. Density filtering of artificial clusters. A.** An ROI from a patient tissue sample is shown with localizations color-coded according to their time of appearance (left). Localization coordinates plotted as a function of their time of appearance reveal the presence of artificial clusters<sup>2</sup> (right). **B.** The application of a density filter (radius of 70 nm with a minimum of 50 localizations) shows that these artificial clusters are removed.

## Supplementary Table 1

|                                                                            | 50 nM Trastuzumab |                |                | 10 nM Trastuzumab |                |                |
|----------------------------------------------------------------------------|-------------------|----------------|----------------|-------------------|----------------|----------------|
|                                                                            | BT-474            | SK-BR-3        | MDA-MB-468     | BT-474            | SK-BR-3        | MDA-MB-468     |
| <b>Density (molecules/<math>\mu\text{m}^2</math>) <math>\pm</math> SEM</b> | 119 $\pm$ 4       | 77 $\pm$ 3     | 4 $\pm$ 0.2    | 99 $\pm$ 3        | 81 $\pm$ 3     | 2 $\pm$ 0.2    |
| CV (%)                                                                     | 42                | 46             | 29             | 38                | 46             | 29             |
| <b>HER2 / cluster <math>\pm</math> SEM</b>                                 | 3.3 $\pm$ 0.1     | 2.5 $\pm$ 0.1  | monomer        | 3.6 $\pm$ 0.2     | 2.5 $\pm$ 0.1  | monomer        |
| CV (%)                                                                     | 14                | 23             | N/A            | 33                | 23             | N/A            |
| <b>Cluster radius (nm) <math>\pm</math> SEM</b>                            | 21 $\pm$ 1        | 24 $\pm$ 1     | N/A            | 20 $\pm$ 1        | 21 $\pm$ 1     | N/A            |
| CV (%)                                                                     | 11                | 15             | N/A            | 21                | 24             | N/A            |
| <b>Clustered HER2 (%) <math>\pm</math> SEM</b>                             | 49 $\pm$ 1        | 59 $\pm$ 2     | 0              | 54 $\pm$ 1        | 54 $\pm$ 1     | 0              |
| CV (%)                                                                     | 12                | 18             | N/A            | 15                | 21             | N/A            |
| <b>Localization precision (nm) <math>\pm</math> SEM</b>                    | 12.3 $\pm$ 0.1    | 11.8 $\pm$ 0.1 | 13.0 $\pm$ 0.2 | 12.0 $\pm$ 0.1    | 12.4 $\pm$ 0.1 | 12.6 $\pm$ 0.3 |
| CV (%)                                                                     | 8                 | 5              | 7              | 5                 | 7              | 7              |
| <b>Coverslips</b>                                                          | 4                 | 3              | 4              | 3                 | 4              | 3              |
| <b>ROIs</b>                                                                | 180               | 163            | 37             | 133               | 193            | 10             |
| <b>p-value<sub>split</sub></b>                                             | 0.5               | 0.3            | 0.2            | 0.4               | 0.3            | 0.1            |

**Supp. Table 1. Breast cancer cell line data summary.** Average values for detected density, HER2 receptors per cluster, cluster radius, fraction of clustered HER2, and localization precision are provided with SEM and CV.

### References:

- 1 Dempsey, G. T., Vaughan, J. C., Chen, K. H., Bates, M. & Zhuang, X. W. Evaluation of fluorophores for optimal performance in localization-based super-resolution imaging. *Nat Methods* **8**, 1027-1036, doi:10.1038/nmeth.1768 (2011).
- 2 Annibale, P., Vanni, S., Scarselli, M., Rothlisberger, U. & Radenovic, A. Identification of clustering artifacts in photoactivated localization microscopy. *Nat Methods* **8**, 527-528, doi:10.1038/nmeth.1627 (2011).

## Supplementary Software: ClusterOccupancy

MATLAB code for computing the fraction of clustered and unclustered molecules within a single region of interest.

```
function [pfm, pcm, pfo, pco] = ClusterOccupancy(ROI,ROIArea,MPC,CR,GR,FG,showFig)
% Calculate cluster occupancy of ROI (fraction of clustered and unclustered molecules)
% Apply DP-Means algorithm to define clusters

% Input:
% ROI = ROI data [X Y Sigma Frames Photons]
% ROIArea = ROI area (ensure same units as X Y)
% MPC = minimum number of molecules to count as part of a cluster, default 3
% CR = cluster radius (PC analysis correlation length), default estimated from X Y
% GR = group radius (gaussian fit to localization precision data), default
prctile(Sigma,98)
% FG = frame group gap, default AF647 at 150s -> 150s*(100f/s exposure time) = 15000
frames
% showFig = show/hide figure with ROI data and cluster occupancy

% Output:
% pfm = '%unclustered' molecules
% pcm = '%clustered' molecules
% pfo = '%unclustered' area occupancy
% pdo = '%clustered' area occupancy

%-----
%% Organize ROI data and check/prepare variables
X = ROI(:,1); Y = ROI(:,2);
Sigma = ROI(:,3);
Frames = ROI(:,4);
Photons = ROI(:,5);

if ~exist('MPC', 'var') || ~MPC, MPC = 3; end
if ~exist('GR', 'var') || ~GR, GR = prctile(Sigma,98); end
if ~exist('FG', 'var') || ~FG, FG = 15000; end
if ~exist('showFig', 'var') || isempty(showFig), showFig = true; end
if ~exist('CR', 'var') || ~CR
    [m,n] = size([X Y]); %estimate CR from coordinate data
    CR = 0.75*((prod(max([X Y])-min([X Y]))*gamma(0.5*n+1))/(m*sqrt(pi.^n))).^(1/n);
end

%% Group localizations (peakclustering) and extract clusters (DP_means)
cM = peakclustering([X Y Sigma Sigma Frames],GR,FG,Photons);

%Identify clusters via spatial data and DP-Means algorithm
[Cxy, cID] = DP_means(cM,CR,mean(cM));

%% Plot ROI data
if showFig
    scnsz = get(0, 'ScreenSize');
    figure('OuterPosition', [1 40 scnsz(3)*0.52 scnsz(4)*0.95], 'Name', 'ROI
Occupancy Map', 'Color', 'w')
    subplot('Position', [0, 0, 1, 0.95])
    plot(X,Y,'b.', 'MarkerSize', 5)
    axis([min(X)*0.997 max(X)*1.003 min(Y)*0.997 max(Y)*1.003])
    set(gca, {'Color', 'XTick', 'YTick'}, {'k', '', ''})
    for i = 1:size(cM(:,1),1) %show grouped coordinates
        radius = GR/3; cir = [cM(i,1)-radius*1.5,cM(i,2)-
radius*1.5,radius*3,radius*3];
        rectangle('Position', cir, 'Curvature', [1,1], 'LineWidth', 0.5, 'EdgeColor', 'r')
```

```

end
end

% Calculate fraction of unclustered and clustered molecules
Nunclustered = 0; Nfm = 0; unclusteredA = 0; %number of unclustered molecules
'clusters', number of unclustered molecules, unclustered area
Nclusters = 0; Ncm = 0; ClusterA = 0; %number of clusters with CR, number of clustered
molecules, cluster area
for i = 1:size(Cxy(:,1),1)
    distance_to_mean = pdist2(cM(cID==i,:),Cxy(i,:));
    cr(i) = max(GR,max(distance_to_mean)); %cluster radius
    cir = [Cxy(i,1)-cr(i),Cxy(i,2)-cr(i),2*cr(i),2*cr(i)];
    if size(cM(cID==i,:),1) < MPC % unclustered molecules
        if showFig,
rectangle('Position',cir,'Curvature',[1,1],'LineWidth',1.5,'EdgeColor','g')
end
        Nunclustered = Nunclustered + 1; Nfm = Nfm + size(cM(cID==i,:),1);
unclusteredA = unclusteredA + pi*cr(i)^2;
    elseif size(cM(cID==i,:),1) >= MPC %clustered molecules
        if showFig,
rectangle('Position',cir,'Curvature',[1,1],'LineWidth',1.5,'EdgeColor',[0.5 0 1])
end
        Nclusters = Nclusters + 1; Ncm = Ncm + size(cM(cID==i,:),1); ClusterA =
ClusterA + pi*cr(i)^2;
    end
end
pfm = (Nfm/(Ncm + Nfm))*100; %% unclustered'
pfo = (unclusteredA/ROIArea)*100; %% unclustered' area
pcm = (Ncm/(Ncm + Nfm))*100; %%clustered'
pco = (ClusterA/ROIArea)*100; %%clustered' area

if showFig %figure title with details, add scalebar
    title({'Molecules: {\color{green}' num2str(pfm,4) '% (' num2str(Nfm) ' )
Unclustered} {\color[rgb]{0.6,0,1}' ...
num2str(pcm,4) '% (' num2str(Ncm) ' ) Clustered}'];...
['Occupancy: {\color{green}' num2str(pfo,3) '% Unclustered}
{\color[rgb]{0.6,0,1}' ...
num2str(pco,3) '%
Clustered}']], 'Color','w', 'BackgroundColor','k', 'EdgeColor','k', 'FontSize',12)
end

disp(['Localizations: ' num2str(length(X))])
disp(['ROI area: ' num2str(ROIArea)])
disp(['Unclustered molecules: ' num2str(Nfm) ' => ' num2str(pfm,4) '%'])
disp(['Unclustered occupancy: ' num2str(pfo,4) '%'])
disp(['Number of clusters: ' num2str(Nclusters)])
disp(['Clustered molecules: ' num2str(Ncm) ' => ' num2str(pcm,4) '%'])
disp(['Cluster occupancy: ' num2str(pco,4) '%'])
disp(' ')

%-----
% Supporting functions: 'peakclustering' and 'DP_means'

function [cK, iK, sK] = peakclustering(D, RG, FG, P)
% Assign initial clusters for DP-Means

% Input:
% D = [X, Y, SigmaX, SigmaY, Frames]
% RG = radius gap
% FG = frame gap
% P = photons

```

```

% Output:
% cK = cluster centers
% iK = cluster indices
% sK = cluster sigmas

%-----
-----
K = 0; %number of clusters
D = sortrows(D,5); %ensure frame numbers increase
iK = zeros(size(D,1),1); %cluster indicator
xK = zeros(K,1); yK = zeros(K,1); %cluster xy-centers
sxK = zeros(K,1); syK = zeros(K,1); %cluster xy-sigma
ia = false(K,1); %active clusters
fgap = zeros(K,1); %frame gap counter

fnum = D(1,5); %frame number
for i = 1:size(D,1) %total number of localizations
    if D(i,5) > fnum %check for frame advance
        fgap = fgap+D(i,5) - fnum; %increase frame gap counter
        fnum = D(i,5);
    end

    ia(fgap >= FG) = false; %check for terminated clusters
    xi = D(i,1); yi = D(i,2);
    sxi = D(i,3); syi = D(i,4);
    if ~isempty(ia)
        dist = sqrt((xK(ia)-xi).^2 + (yK(ia)-yi).^2)/RG; %euclidean norm, good
match
        [dmin,imin] = min(dist);
    else
        dmin = inf;
    end
    if isempty(ia) || (sum(ia)==1 && fgap(K)==0) %clusters terminated/new frame
        dmin = inf;
    end
    if dmin < 1 %assign to existing cluster
        nK = (1:K); nK = nK(ia); %active cluster indices
        jK = nK(imin); %assigned cluster
        iK(i) = jK;
        fgap(jK,1) = 0; %reset frame gap counter of assigned cluster
        %update cluster means and sigmas
        itemp = iK == iK(i); % points in updated cluster

        x-values
        xK(jK) = P(itemp)'*D(itemp,1)/sum(P(itemp)); %photon weighted average of
        y-values
        yK(jK) = P(itemp)'*D(itemp,2)/sum(P(itemp)); %photon weighted average of

        sxK(jK) = std(D(itemp,1));
        syK(jK) = std(D(itemp,2));

    else %create new cluster
        K = K+1; iK(i) = K;
        xK(K,1) = xi; yK(K,1) = yi;
        sxK(K,1) = sxi; syK(K,1) = syi;
        ia(K,1) = true; %make new cluster active
        fgap(K,1) = 0; %initialize frame gap counter for new cluster to 0
    end
end
cK = [xK yK];
sK = [sxK syK];

function [cXY, cID] = DP_means(cM,lambda,cMm)

```

```

% Adapted from Kulis & Jordan 2012, "Revisiting k-means: New Algorithms via Bayesian
Nonparametrics"
% Algorithm 1 in paper

% Input:
% cM = grouped localization centers from peakclustering
% lambda = cluster radius
% cMm = cluster seed coordinates

% Output:
% cXY = cluster coordinates
% cID = cluster indices

%-----
K = 1; %initial number of clusters
n = size(cM,1); %number of localizations
iter = 0; %run algorithm at least once
c_old = zeros(n,1); criterion_met = 0; %stop criteria, met when c == c_old
lambda_criterion = 1; %Assign data to nearest cluster: satisfied when there are no
points lambda away from the nearest cluster

h = waitbar(0,'DP-Means: Analyzing cluster occupancy ...');
while criterion_met == 0 || lambda_criterion == 1
    iter = iter + 1;
    distance_to_mean = pdist2(cM,cMm); %Euclidean distance
    %distance_to_mean = pdist2(Mc,Mcm,'chebychev'); %Chebychev distance (aka, infinity
norm) (max coordinate difference)

    %Assign clusters
    [min_value_vec, index] = min(distance_to_mean,[],2); cID(1:n,1) = index;

    criterion_met = 0;
    if all(eq(cID,c_old)) %ensure k-means has converged before adding a new cluster
        criterion_met = 1; %k-means converged, now add cluster if needed
        [~,ind] = max(min_value_vec); %index of outlier
        lambda_criterion = any(min_value_vec > lambda);
        if lambda_criterion > 0 %create new cluster (at least lambda away from
nearest cluster)
            K = K+1; cID(ind,1) = K;
            cMm = [cMm; cM(ind,1:2)]; %create new cluster for outlier
        end
    end

    %calculate means (https://statinfer.wordpress.com/2011/12/12/efficient-matlab-ii-
kmeans-clustering-algorithm/)
    E = sparse(1:n,cID,1,n,K,n); %transform label into indicator matrix
    cMm = (E*spdiags(1./sum(E,1)',0,K,K))'*cM; %compute cluster matrix
    c_old = cID;

    waitbar(K/n,h)
end
close(h)

```
